# Supplementary material
Source: PubMed Central journal article supplement (PMC3810076)
Supplement: ASN.2012090950_ASN2012090950SupplementaryData.pdf [file ASN.2012090950_ASN2012090950SupplementaryData.pdf]

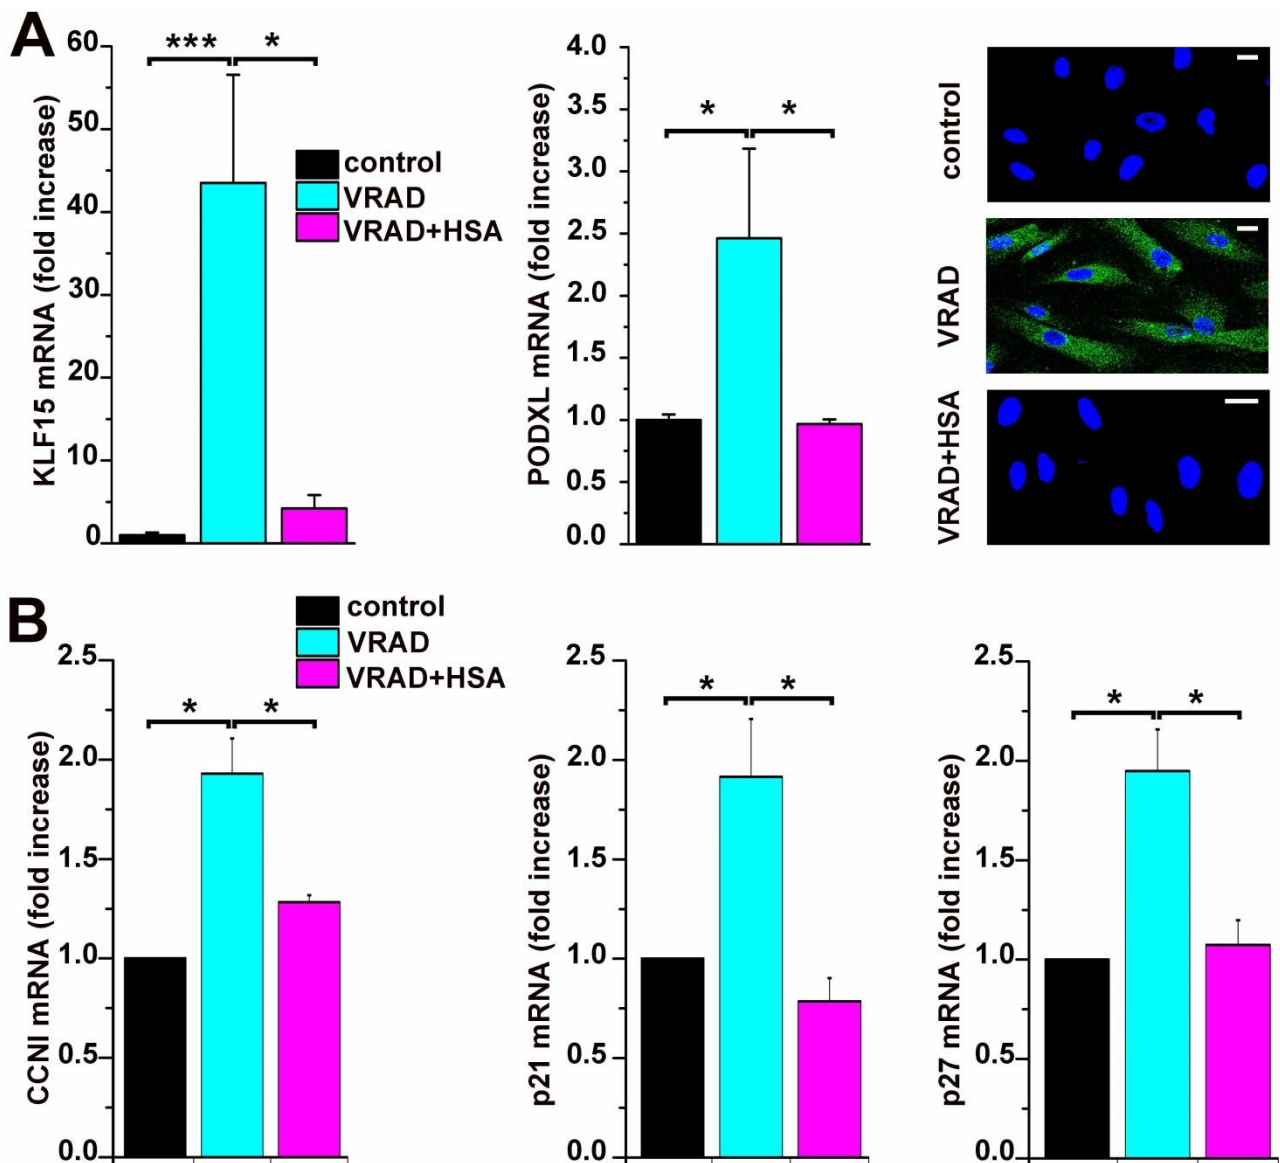

**Supplementary Figure 1. Albumin overload impairs RPC differentiation into podocyte.** (A) Assessment of mRNA levels of KLF15 (left panel,  $n=6$ ) and PODXL (central panel,  $n=4$ ) and protein expression of podocin (right panel, one representative of four experiments is shown) on human RPC cultured in control medium, VRAD medium alone or supplemented with 10 mg/ml HSA. (B) mRNA levels of CCNI, p21 and p27 ( $n=4$ ) in human RPC cultured in control medium, VRAD medium alone or supplemented with 10 mg/ml HSA. Topro-3 counterstains nuclei (blue). Bars 20  $\mu\text{m}$ . All data are means  $\pm$  s.e.m., \* $P < 0.05$  and \*\*\* $P < 0.001$  by Mann-Whitney test for (A) and (B).

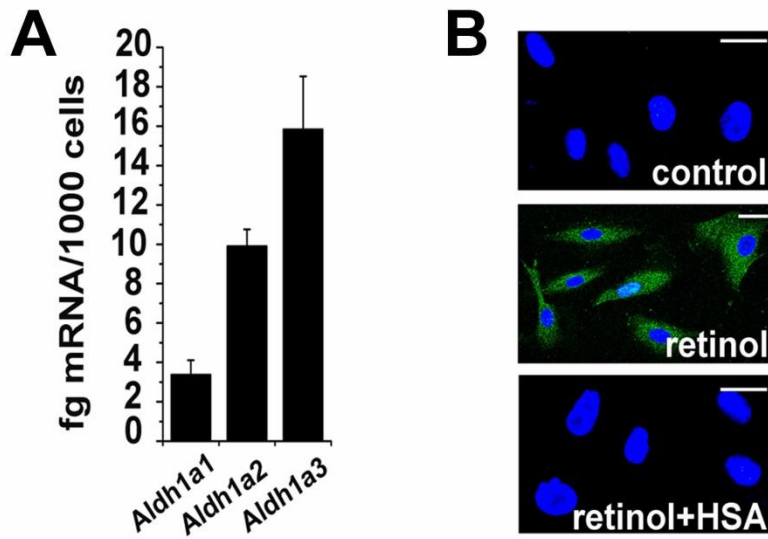

**Supplementary Figure 2. Albumin overload impairs RPC differentiation induced by retinol.** (A) Expression of Aldh1a1, 2 and 3 mRNA in human RPC ( $n=15$ ). (B) Effect of HSA (10 mg/ml) on nephrin (green nephrin, blue Topro-3 nuclear staining) expression increase induced by retinol treatment in human RPC ( $n=6$ ). Bars 20  $\mu$ m.

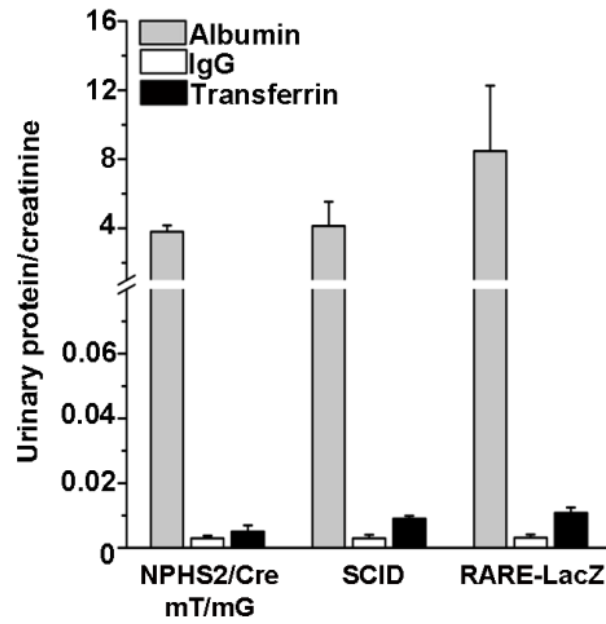

**Supplementary Figure 3. Evaluation of albumin, transferrin and IgG normalized on creatinine in the urine of three different mice strains after induction of AN.** Albumin, transferrin, IgG and creatinine levels were measured in 15 mice/group at day 11 following AN induction. Data are means  $\pm$  s.e.m.; not significant by Mann-Whitney test.

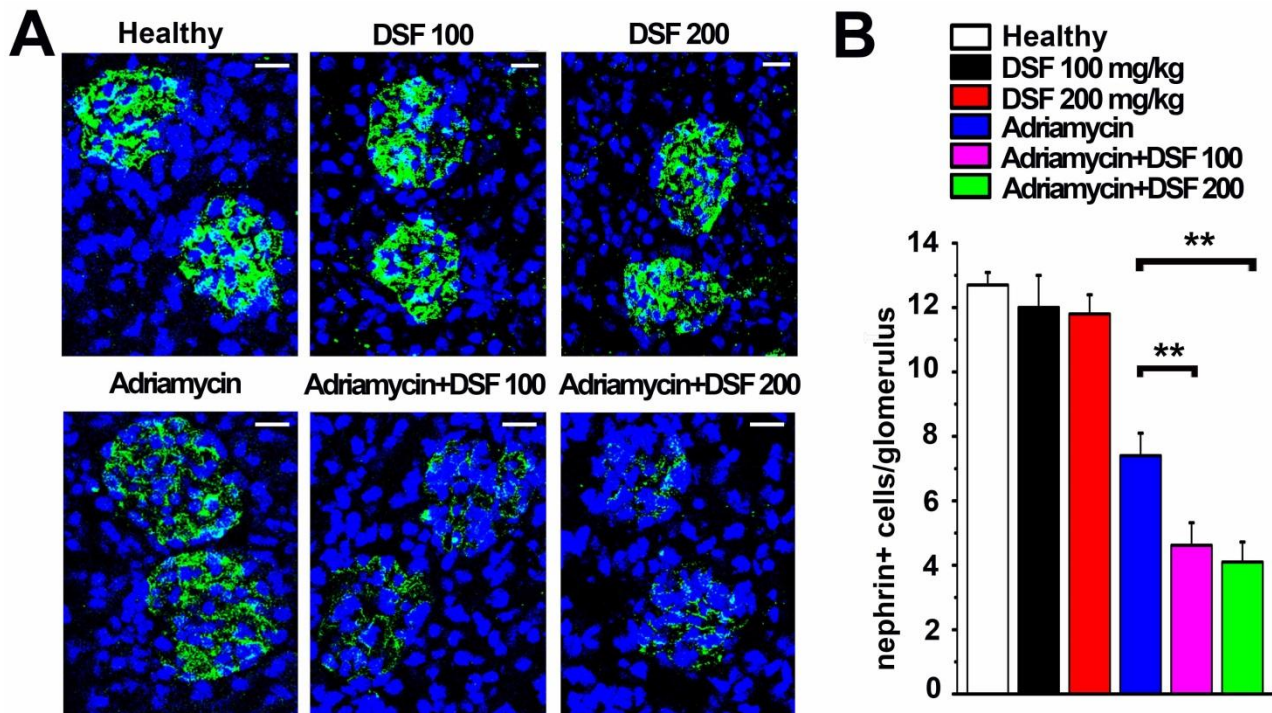

**Supplementary Figure 4. Effect of blocking endogenous retinoic acid synthesis on podocyte number in SCID mice with FSGS.** (A) Representative staining of nephrin (green) on kidney sections of healthy mice and of mice with adriamycin nephropathy untreated or treated with DSF 100 mg/kg and 200 mg/kg. (B) Quantitation of podocyte number (nephrin+ cells)/glomerulus in healthy mice and in mice with adriamycin nephropathy untreated or treated with DSF 100 mg/kg and 200 mg/kg ( $n=6$  for each group of mice) Topro-3 counterstains nuclei (blue). Bars 20  $\mu$ m. All data are means  $\pm$  s.e.m., \*\* $P<0.01$  by Mann-Whitney test.

## albuminuria 40 mg/dl

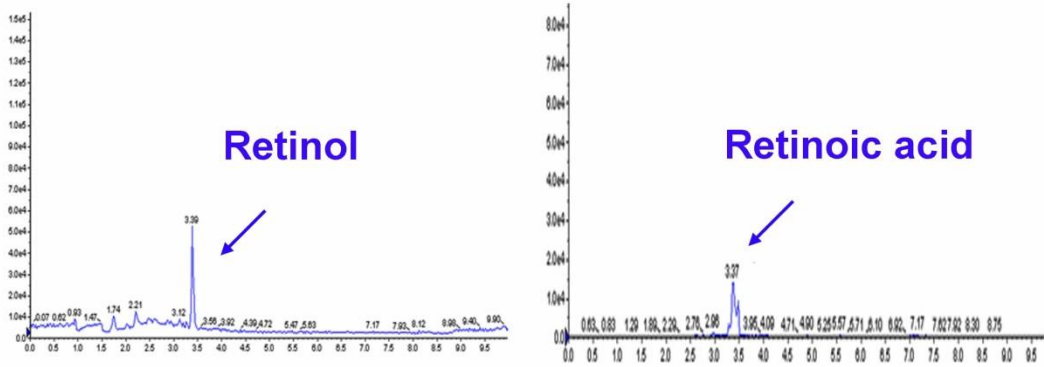

## albuminuria 340 mg/dl

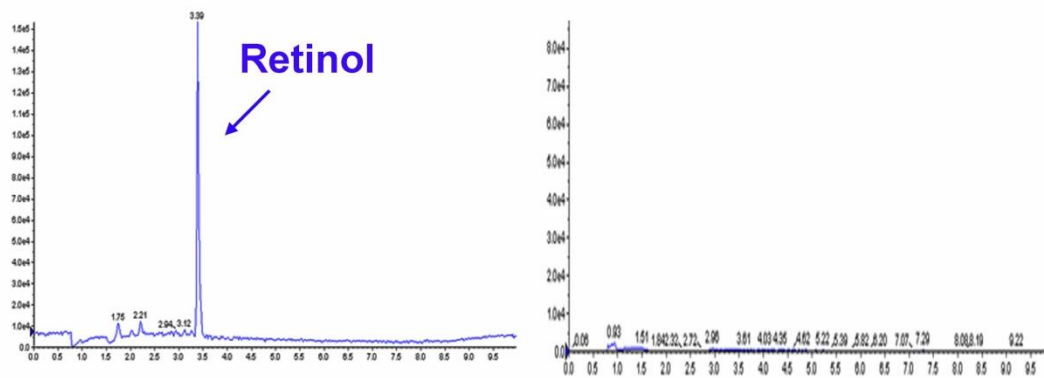

**Supplementary Figure 5. LC-MS/MS analysis of RA and retinol in mice urine.** Representative chromatograms of the presence of retinol and RA in urine of mice with low (top) or high (bottom) albuminuria.

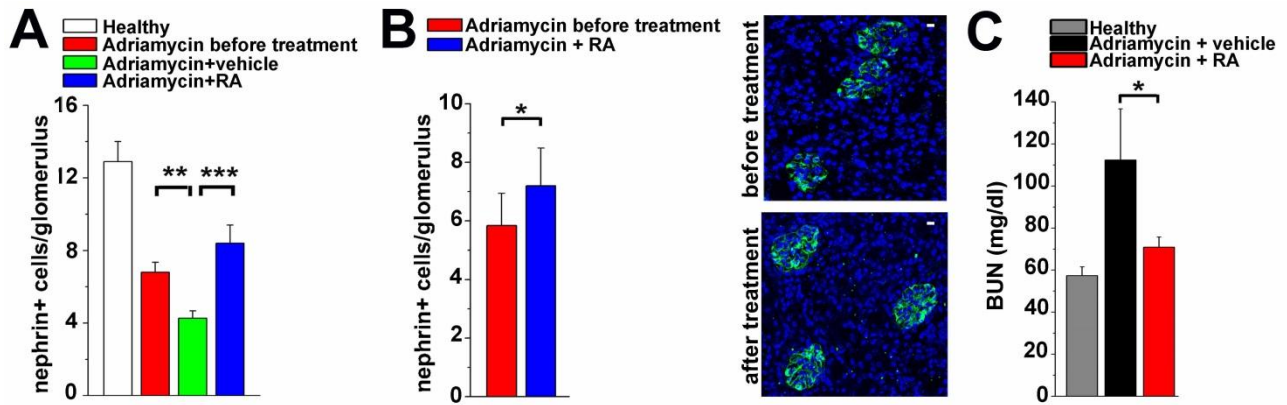

**Supplementary Figure 6. RA treatment increases podocyte number.** (A) Quantitation of podocyte number (nephrin+ cells)/glomerulus in healthy ( $n=10$ ), adriamycin before treatment ( $n=10$ ), adriamycin + vehicle ( $n=11$ ), adriamycin + RA ( $n=11$ ). (B) Left: quantitation of podocyte number (nephrin+ cells/glomerulus) in renal biopsies ( $n=12$ ) of mice with adriamycin nephropathy before and after RA treatment. Right: representative staining of nephrin (green) in renal biopsies of mice with adriamycin nephropathy before (top) and after (bottom) RA treatment. (C) BUN levels in healthy ( $n=10$ ), adriamycin + vehicle ( $n=11$ ), adriamycin + RA ( $n=11$ ). Topro-3 counterstains nuclei (blue). Bars 20 $\mu$ m. All data are means  $\pm$  s.e.m. \* $P<0.05$  \*\* $P<0.01$  \*\*\* $P<0.001$  by Mann-Whitney test for (A) and (C), and by Wilcoxon test for (B).
